# Supplementary material for: Differential Cytokine Responses and the Clinical Severity of Adult and Pediatric Nephropathia Epidemica
Source: MDPI journal article supplement (doi:10.3390/ijms24087016), 2023-04-10
Supplement: s1 [file s1]

**Table S1.** List of the obtained PUUV strains and GenBank accession No of S segment sequences.

| Strain                                | Short Name | Accession No |
|---------------------------------------|------------|--------------|
| PUUV/Kazan/human_RT465/2019/segment S | Hu465      | OQ067390     |
| PUUV/Kazan/human_RT585/2019/segment S | HU585      | OQ067391     |
| PUUV/Kazan/human_RT600/2019/segment S | Hu600      | OQ067392     |
| PUUV/Kazan/human_RT626/2019/segment S | HU626      | OQ067393     |
| PUUV/Kazan/human_RT627/2019/segment S | HU627      | OQ067394     |

**Table S2.** List of the PUUV sequences used for phylogenetic analysis as references.

| Strain sequence                                   | Short Name | GenBank Accession No |
|---------------------------------------------------|------------|----------------------|
| PUUV/Vysokaya Gora/MG_066/2015/segment S          |            | MZ913276             |
| PUUV/Observatory/MG_118/2015/segment S            |            | MW587801             |
| PUUV/Kazan/MG_845/2017/segment S                  |            | MW587804             |
| PUUV/Pestretsy/MG_273/2015/segment S              |            | MW504248             |
| PUUV/Lenino-Kokushkino/MG_1140/2017/segment S     |            | MW504252             |
| PUUV/Staraya Pristan/MG_1675/2019/segment S       |            | MW504256             |
| PUUV/Laishevo/MG_809/2017/segment S               |            | MW504247             |
| PUUV/Sotyi/MG_952/2017/segment S                  |            | MZ441152             |
| PUUV/Mamadysh/MG_980/2017/segment S               |            | MW504250             |
| PUUV/Verkhniaya Oshma/MG_1215/2018/segment S      |            | MW504253             |
| PUUV/Tetevo/MG_1041/2017/segment S                |            | MZ441151             |
| PUUV/Naberezhnye Chelny/MG_260/2015/segment S     |            | MW504226             |
| PUUV/Nizhnekamsk/MG_134/2015/segment S            |            | MW504222             |
| PUUV/Almetievsk/MG_1182/2018/segment S            |            | MW504212             |
| PUUV/Tatarskoe Utiashkino/MG_1419/2019/segment S  |            | MW504213             |
| PUUV/Kurkul/MG_1459/2019/segment S                |            | MW504214             |
| PUUV/Oktiabrino/MG_1469/2019/segment S            |            | MW504215             |
| PUUV/Chistopolskie Vyselki/MG_2030/2020/segment S |            | MW504224             |
| PUUV/Galaktionovo/MG_2038/2020/segment S          |            | MW504245             |
| PUUV/Starye Salmany/MG_1589/2019/segment S        |            | MW504240             |
| PUUV/Verkhnee Almurzino/MG_1613/2019/segment S    |            | MW504218             |
| PUUV/Lesnye Morkvashi/MG_794/2017/segment S       |            | MW587803             |
| Puu/Kazan                                         |            | Z84204               |
| DTK/Ufa-97                                        |            | AB297665             |
| Samara_49/CG/2005                                 |            | AB433843             |
| Sotkamo 2009                                      |            | HE801633             |
| Tula virus                                        |            | EU439951             |
| PUUV/Kazan/human_RT458/2019/segment S             | Hu458      | MW587805             |
| PUUV/Kazan/human_RT461/2019/segment S             | Hu461      | MW587793             |
| PUUV/Kazan/human_RT464/2019/segment S             | Hu464      | MZ913278             |
| PUUV/Kazan/human_RT466/2019/segment S             | Hu466      | MZ913279             |
| PUUV/Kazan/human_RT471/2019/segment S             | Hu471      | OP459274             |
| PUUV/Kazan/human_RT475/2019/segment S             | Hu475      | MZ913280             |
| PUUV/Kazan/human_RT487/2019/segment S             | Hu487      | OP459275             |
| PUUV/Kazan/human_RT488/2019/segment S             | Hu488      | MW587794             |
| PUUV/Kazan/human_RT493/2019/segment S             | Hu493      | MW587795             |
| PUUV/Kazan/human_RT497/2019/segment S             | Hu497      | MW587796             |
| PUUV/Kazan/human_RT500/2019/segment S             | Hu500      | MW587808             |

|                                       |       |          |
|---------------------------------------|-------|----------|
| PUUV/Kazan/human_RT505/2019/segment S | Hu505 | MW587797 |
| PUUV/Kazan/human_RT518/2019/segment S | Hu518 | MW587798 |
| PUUV/Kazan/human_RT520/2019/segment S | Hu520 | MW587799 |
| PUUV/Kazan/human_RT523/2019/segment S | Hu523 | MZ913281 |
| PUUV/Kazan/human_RT526/2019/segment S | Hu526 | MW587809 |
| PUUV/Kazan/human_RT542/2019/segment S | Hu542 | OP459295 |
| PUUV/Kazan/human_RT545/2019/segment S | Hu545 | MW587810 |
| PUUV/Kazan/human_RT546/2019/segment S | Hu546 | MW587800 |
| PUUV/Kazan/human_RT549/2019/segment S | Hu549 | OP459278 |
| PUUV/Kazan/human_RT563/2019/segment S | Hu563 | MZ913284 |
| PUUV/Kazan/human_RT566/2019/segment S | Hu566 | OP459279 |
| PUUV/Kazan/human_RT574/2019/segment S | Hu574 | MW587800 |
| PUUV/Kazan/human_RT587/2019/segment S | Hu587 | OP459283 |
| PUUV/Kazan/human_RT598/2019/segment S | Hu598 | OP459285 |
| PUUV/Kazan/human_RT599/2019/segment S | Hu599 | OP459286 |
| PUUV/Kazan/human_RT602/2019/segment S | Hu602 | OP459287 |
| PUUV/Kazan/human_RT603/2019/segment S | Hu603 | OP459288 |
| PUUV/Kazan/human_RT604/2019/segment S | Hu604 | MZ913285 |
| PUUV/Kazan/human_RT608/2019/segment S | Hu608 | OP459289 |
| PUUV/Kazan/human_RT611/2019/segment S | HU611 | OP459290 |
| PUUV/Kazan/human_RT614/2019/segment S | Hu614 | OP459291 |
| PUUV/Kazan/human_RT624/2019/segment S | Hu624 | OP459292 |
| PUUV/Kazan/human_RT638/2019/segment S | Hu638 | MZ913286 |
| PUUV/Kazan/human_RT639/2019/segment S | HU639 | OP459294 |

**Table S3.** Analysis of signs and symptoms in adult and children NE.

| Feature                |          | Adult NE        | Children NE     | <i>p</i> Value      |
|------------------------|----------|-----------------|-----------------|---------------------|
| Severity               |          | 2.05 ± 0.38     | 2.09 ± 0.30     | 0.77                |
| Fever, days            |          | 6.26 ± 2.45     | 6.64 ± 3.50     | 0.83                |
| 2nd fever, days        |          | 1.01 ± 2.21     | 0.00 ± 0.00     | <b>0.04 *</b>       |
| Headache, days         |          | 4.52 ± 2.91     | 1.27 ± 2.57     | <b>0.001 *</b>      |
| Cough, days            |          | 0.73 ± 2.34     | 0.00 ± 0.00     | 0.17                |
| Nausea, days           |          | 1.19 ± 1.81     | 0.55 ± 0.52     | 0.91                |
| Vomit, days            |          | 0.53 ± 1.08     | 0.45 ± 0.52     | 0.48                |
| Abdominal pain, days   |          | 1.15 ± 1.87     | 0.64 ± 0.92     | 0.86                |
| Diarrhea, days         |          | 0.78 ± 1.51     | 0.09 ± 0.30     | 0.08                |
| Lumbar pain, days      |          | 4.47 ± 3.43     | 3.00 ± 5.33     | <b>0.03 *</b>       |
| Oliguria, days         |          | 2.22 ± 1.92     | 1.00 ± 1.41     | <b>0.03 *</b>       |
| Anuria, days           |          | 0.06 ± 0.32     | 0.00 ± 0.00     | 0.51                |
| Urea, mMdL             | Febrile  | 8.39 ± 6.03     | 5.18 ± 1.99     | 0.07                |
|                        | Oliguric | 10.13 ± 7.50    | 10.29 ± 9.95    | 0.35                |
|                        | Polyuric | 6.44 ± 8.87     | 5.28 ± 1.11     | 0.98                |
| sCr, mM/L              | Febrile  | 148.85 ± 112.36 | 70.55 ± 17.33   | <b>&lt;0.0001 *</b> |
|                        | Oliguric | 172.64 ± 141.60 | 144.64 ± 118.82 | 0.14                |
|                        | Polyuric | 103.60 ± 31.93  | 75.18 ± 28.85   | <b>0.01 *</b>       |
| K, mEq/L               | Febrile  | 4.04 ± 0.43     | 4.06 ± 0.28     | 0.96                |
|                        | Oliguric | 5.43 ± 11.91    | 4.40 ± 0.50     | 0.99                |
| Thrombocytes, cells/μL | Febrile  | 90.71 ± 56.30   | 91.73 ± 51.39   | 0.96                |
|                        | Oliguric | 143.37 ± 82.75  | 150.45 ± 69.70  | 0.56                |
|                        | Polyuric | 256.71 ± 83.75  | 266.55 ± 68.31  | 0.65                |

|                            |          |                |                |      |
|----------------------------|----------|----------------|----------------|------|
| ALT, Ed/L                  | Febrile  | 50.90 ± 47.00  | 38.00 ± 29.62  | 0.26 |
|                            | Oliguric | 58.53 ± 61.80  | 37.82 ± 25.02  | 0.15 |
|                            | Polyuric | 61.17 ± 66.54  | 39.82 ± 30.96  | 0.12 |
| AST, Ed/L                  | Febrile  | 54.96 ± 40.65  | 67.27 ± 31.93  | 0.07 |
|                            | Oliguric | 52.90 ± 39.69  | 54.00 ± 19.43  | 0.20 |
|                            | Polyuric | 45.90 ± 28.01  | 43.64 ± 15.95  | 0.72 |
| Leukocytes, cells/ $\mu$ L | Febrile  | 9.56 ± 5.47    | 7.80 ± 4.19    | 0.19 |
|                            | Oliguric | 10.54 ± 4.30   | 10.14 ± 3.56   | 0.80 |
|                            | Febrile  | 8.14 ± 2.20    | 7.31 ± 1.44    | 0.27 |
| Hemoglobin, g/L            | Oliguric | 146.17 ± 22.92 | 142.27 ± 17.92 | 0.39 |
|                            | Polyuric | 137.22 ± 20.03 | 132.73 ± 11.41 | 0.33 |
|                            | Febrile  | 139.95 ± 16.00 | 135.64 ± 10.48 | 0.27 |

\*  $p$  adj. < 0.05 when compared with controls.

**Table S4.** Analysis of serum cytokines level in adult NE.

| Marker       |                 | Control, pg/mL    | NE (Febrile Phase),<br>pg/mL | NE (Oliguric Phase),<br>pg/mL | NE (Polyuric Phase),<br>pg/mL |
|--------------|-----------------|-------------------|------------------------------|-------------------------------|-------------------------------|
| Chemokines   | CCL27           | 13.79 ± 4.46      | <b>66.65 ± 21.04 *</b>       | <b>70.63 ± 37.86 *</b>        | <b>59.98 ± 29.38 *</b>        |
|              | CCL11           | 11.44 ± 10.98     | 9.42 ± 8.96                  | 8.40 ± 6.59                   | 7.99 ± 7.61                   |
|              | G-CSF           | 34.68 ± 26.35     | 243.79 ± 321.75              | 182.13 ± 287.51               | 165.49 ± 270.70               |
|              | GM-CSF          | 31.87 ± 5.21      | <b>64.89 ± 12.29 *</b>       | <b>63.43 ± 9.77 *</b>         | <b>62.00 ± 8.90 *</b>         |
|              | CXCL1           | 186.23 ± 41.24    | <b>388.57 ± 22.60 *</b>      | <b>387.78 ± 33.63 *</b>       | <b>386.86 ± 43.58 *</b>       |
|              | HGF             | 213.14 ± 106.47   | 187.24 ± 104.84              | <b>147.06 ± 68.15 *</b>       | 177.47 ± 92.25                |
|              | IFN- $\alpha$ 2 | 22.35 ± 5.71      | <b>69.17 ± 14.52 *</b>       | <b>71.57 ± 11.10 *</b>        | <b>71.04 ± 10.30 *</b>        |
|              | IFN- $\gamma$   | 63.83 ± 7.67      | 69.20 ± 13.63                | 65.27 ± 13.69                 | 66.80 ± 16.71                 |
|              | CXCL10          | 123.98 ± 18.71    | 148.70 ± 34.24               | <b>152.34 ± 39.09 *</b>       | <b>148.46 ± 38.57 *</b>       |
|              | LIF             | 183.61 ± 35.36    | <b>239.10 ± 72.19 *</b>      | <b>316.15 ± 367.80 *</b>      | <b>280.32 ± 52.77 *</b>       |
|              | M-CSF           | 42.95 ± 6.92      | <b>73.88 ± 9.12 *</b>        | <b>74.32 ± 12.28 *</b>        | <b>74.45 ± 11.60 *</b>        |
|              | CCL2            | 171.49 ± 40.24    | <b>366.42 ± 65.95 *</b>      | <b>349.60 ± 54.42 *</b>       | <b>345.02 ± 67.96 *</b>       |
|              | CCL7            | 56.20 ± 12.71     | 50.25 ± 9.45                 | 50.49 ± 11.60                 | 49.37 ± 10.67                 |
|              | MIF             | 134.70 ± 60.44    | 127.78 ± 47.33               | 125.02 ± 51.94                | 121.25 ± 49.03                |
|              | CXCL9           | 61.10 ± 26.09     | <b>160.43 ± 36.17 *</b>      | <b>155.78 ± 43.57 *</b>       | <b>157.22 ± 31.18 *</b>       |
|              | CCL3            | 19.10 ± 24.94     | <b>51.80 ± 46.02 *</b>       | <b>43.77 ± 46.09 *</b>        | <b>42.56 ± 42.61 *</b>        |
|              | CCL4            | 13.87 ± 4.02      | <b>19.70 ± 7.64 *</b>        | <b>20.29 ± 9.10 *</b>         | <b>17.30 ± 6.32 *</b>         |
|              | PDGF-BB         | 151.66 ± 62.01    | 179.07 ± 59.33               | 171.98 ± 43.17                | 170.23 ± 51.45                |
|              | CCL5            | 183.05 ± 206.19   | <b>372.46 ± 272.22 *</b>     | <b>373.55 ± 262.26 *</b>      | <b>308.84 ± 226.01 *</b>      |
|              | SCF             | 33.40 ± 44.72     | 25.19 ± 34.57                | 31.26 ± 44.53                 | 23.08 ± 21.37                 |
|              | SCGF-b          | 7569.40 ± 6079.21 | 12145.38 ± 11662.96          | 12186.00 ± 9873.16            | 11855.44 ± 9934.26            |
|              | SDF-1a          | 31.13 ± 10.24     | 43.02 ± 28.16                | 46.63 ± 28.05                 | 38.14 ± 28.84                 |
|              | TNF-a           | 34.51 ± 7.78      | <b>78.59 ± 18.73 *</b>       | <b>76.64 ± 16.11 *</b>        | <b>82.27 ± 16.15 *</b>        |
|              | TNF-b           | 23.62 ± 39.13     | 37.16 ± 49.46                | 44.38 ± 54.02                 | 30.05 ± 41.82                 |
|              | TRAIL           | 26.92 ± 6.90      | <b>44.53 ± 8.11 *</b>        | <b>46.07 ± 8.60 *</b>         | <b>46.66 ± 11.48 *</b>        |
|              | VEGF            | 204.85 ± 48.57    | <b>428.98 ± 40.64 *</b>      | <b>425.22 ± 58.89 *</b>       | <b>442.73 ± 62.34 *</b>       |
|              | b-NGF           | 20.22 ± 5.11      | 20.00 ± 5.05                 | 18.48 ± 5.26                  | 18.38 ± 5.17                  |
|              | bFGF            | 62.24 ± 11.80     | 63.60 ± 11.82                | 69.13 ± 51.61                 | 67.73 ± 12.93                 |
| Interleukins | IL-1Ra          | 97.87 ± 92.23     | 123.77 ± 167.31              | 191.10 ± 204.95               | 155.03 ± 192.33               |
|              | IL-1 $\alpha$   | 84.76 ± 15.19     | 85.78 ± 14.40                | 83.73 ± 16.58                 | 79.00 ± 16.57                 |
|              | IL-1 $\beta$    | 4.74 ± 8.06       | <b>21.08 ± 3.04 *</b>        | <b>24.37 ± 8.67 *</b>         | <b>24.63 ± 13.32 *</b>        |
|              | IL-2            | 130.70 ± 13.09    | <b>146.00 ± 12.84 *</b>      | <b>144.76 ± 11.70 *</b>       | <b>144.36 ± 10.73 *</b>       |
|              | IL-2Ra          | 93.19 ± 8.69      | <b>118.53 ± 26.54 *</b>      | <b>121.16 ± 15.98 *</b>       | <b>117.22 ± 17.37 *</b>       |
|              | IL-3            | 11.06 ± 0.63      | <b>13.41 ± 0.85 *</b>        | <b>13.49 ± 0.93 *</b>         | <b>17.22 ± 21.07 *</b>        |

|                                     |           |                 |                          |                            |                           |
|-------------------------------------|-----------|-----------------|--------------------------|----------------------------|---------------------------|
|                                     | IL-4      | 8.93 ± 5.54     | <b>11.62 ± 2.99 *</b>    | <b>12.44 ± 3.29 *</b>      | <b>14.32 ± 9.02 *</b>     |
|                                     | IL-5      | 208.17 ± 46.07  | <b>409.50 ± 31.15 *</b>  | <b>401.68 ± 38.22 *</b>    | <b>404.29 ± 35.16 *</b>   |
|                                     | IL-6      | 28.76 ± 5.03    | 29.99 ± 5.60             | 29.05 ± 5.38               | 33.22 ± 33.15             |
|                                     | IL-7      | 135.56 ± 52.55  | <b>173.68 ± 10.52 *</b>  | <b>174.80 ± 8.71 *</b>     | <b>175.14 ± 9.31 *</b>    |
|                                     | IL-8      | 22.90 ± 18.20   | 36.46 ± 5.62             | 36.43 ± 4.46               | 37.65 ± 4.04              |
|                                     | IL-9      | 7.78 ± 7.33     | <b>16.23 ± 3.56 *</b>    | <b>17.31 ± 5.80 *</b>      | <b>15.62 ± 3.77 *</b>     |
|                                     | IL-10     | 30.77 ± 6.25    | <b>64.91 ± 8.90 *</b>    | <b>65.04 ± 8.37 *</b>      | <b>65.17 ± 9.42 *</b>     |
|                                     | IL-12p40  | 420.69 ± 69.56  | <b>655.23 ± 81.66 *</b>  | <b>642.94 ± 89.91 *</b>    | <b>645.02 ± 105.99 *</b>  |
|                                     | IL-12p70  | 296.14 ± 19.86  | 318.40 ± 46.88           | 320.07 ± 53.87             | <b>349.76 ± 67.48 *</b>   |
|                                     | IL-13     | 28.59 ± 4.22    | 29.93 ± 6.57             | 30.68 ± 5.19               | 28.75 ± 4.79              |
|                                     | IL-15     | 973.38 ± 205.59 | <b>1365.60 ± 63.18 *</b> | <b>1566.65 ± 1536.77 *</b> | <b>1401.17 ± 199.06 *</b> |
|                                     | IL-16     | 73.49 ± 14.23   | <b>108.52 ± 33.49 *</b>  | <b>113.51 ± 34.13 *</b>    | <b>108.98 ± 29.44 *</b>   |
|                                     | IL-17     | 138.92 ± 11.76  | <b>210.64 ± 29.28 *</b>  | <b>200.20 ± 27.54 *</b>    | <b>195.01 ± 24.16 *</b>   |
|                                     | IL-18     | 65.27 ± 6.04    | <b>76.06 ± 15.24 *</b>   | <b>82.71 ± 16.05 *</b>     | <b>82.27 ± 15.30 *</b>    |
| Urine kidney<br>damage mark-<br>ers | Calbindin | 41.12 ± 23.56   | <b>27.24 ± 59.65 *</b>   | <b>16.43 ± 26.88 *</b>     | <b>17.70 ± 30.97 *</b>    |
|                                     | GST-p     | 1.37 ± 1.69     | 16.44 ± 49.13            | 8.62 ± 22.46               | 4.67 ± 7.28               |
|                                     | IL-18     | 1.64 ± 1.77     | 2.07 ± 5.47              | 8.17 ± 44.75               | 1.74 ± 5.14               |
|                                     | KIM-1     | 0.86 ± 0.89     | 0.65 ± 1.10              | 1.29 ± 4.01                | 1.60 ± 5.11               |
|                                     | MCP-2     | 1.49 ± 2.21     | 0.94 ± 1.65              | 1.18 ± 3.25                | 1.61 ± 4.13               |
|                                     | Clusterin | 40.43 ± 70.92   | <b>383.60 ± 823.43 *</b> | <b>505.09 ± 789.47 *</b>   | <b>431.15 ± 805.62 *</b>  |

\* *p* adj. < 0.05 when compared with Controls.

**Table S5.** Analysis of serum cytokines level in pediatric NE.

| Marker     | Control, pg/mL | NE (Febrile Phase), | NE (Oliguric Phase),    | NE (Polyuric Phase),     |
|------------|----------------|---------------------|-------------------------|--------------------------|
|            |                | pg/mL               | pg/mL                   | pg/mL                    |
| Chemokines | CCL27          | 76.29 ± 6.67        | <b>187.91 ± 17.83 *</b> | <b>268.83 ± 191.06 *</b> |
|            | CCL11          | 7.45 ± 3.44         | <b>23.19 ± 11.56 *</b>  | <b>16.83 ± 4.40 *</b>    |
|            | G-CSF          | 184.74 ± 23.82      | 195.19 ± 36.55          | 188.92 ± 36.31           |
|            | GM-CSF         | 61.07 ± 11.36       | 62.41 ± 11.60           | 57.57 ± 9.71             |
|            | CXCL1          | 404.05 ± 22.78      | 406.52 ± 24.70          | 394.21 ± 33.17           |
|            | HGF            | 190.77 ± 67.23      | 159.55 ± 36.05          | 163.59 ± 36.70           |
|            | IFN-α2         | 54.73 ± 7.84        | 53.22 ± 8.15            | 56.83 ± 8.23             |
|            | IFN-γ          | 79.26 ± 10.53       | 73.52 ± 21.01           | 81.89 ± 9.97             |
|            | CXCL10         | 60.94 ± 15.78       | <b>202.15 ± 49.47 *</b> | <b>160.79 ± 39.28 *</b>  |
|            | LIF            | 300.41 ± 17.30      | 292.94 ± 41.13          | 252.92 ± 67.16           |
|            | M-CSF          | 59.30 ± 10.70       | 52.80 ± 2.57            | 68.05 ± 7.05             |
|            | CCL2           | 25.74 ± 5.32        | <b>45.30 ± 5.22 *</b>   | <b>58.66 ± 25.00 *</b>   |
|            | CCL7           | 41.51 ± 2.35        | 44.59 ± 3.42            | 39.35 ± 9.38             |
|            | MIF            | 176.65 ± 39.97      | <b>223.86 ± 28.00 *</b> | 175.72 ± 35.22           |
|            | CXCL9          | 38.27 ± 18.25       | 58.46 ± 20.09           | 65.25 ± 25.96            |
|            | CCL3           | 7.91 ± 1.44         | 8.71 ± 1.16             | 7.83 ± 0.95              |
|            | CCL4           | 11.67 ± 5.76        | 24.14 ± 10.50           | <b>31.63 ± 10.66 *</b>   |
|            | PDGF-BB        | 126.44 ± 65.79      | 194.54 ± 23.76          | 185.87 ± 38.77           |
|            | CCL5           | 199.60 ± 194.63     | 157.34 ± 37.56          | 347.85 ± 228.94          |
|            | SCF            | 42.11 ± 25.81       | 82.96 ± 50.34           | 79.47 ± 22.40            |
|            | SCGF-b         | 2794.56 ± 1845.40   | 7457.16 ± 9822.63       | 5977.91 ± 4262.90        |
|            | SDF-1a         | 61.91 ± 28.42       | <b>111.60 ± 19.07 *</b> | 91.84 ± 22.68            |
|            | TNF-a          | 113.02 ± 24.42      | <b>351.34 ± 73.37 *</b> | <b>322.20 ± 32.89 *</b>  |
|            | TNF-b          | 104.96 ± 36.48      | 135.34 ± 33.13          | 122.87 ± 26.41           |
|            | TRAIL          | 41.68 ± 4.84        | 39.37 ± 10.53           | 38.95 ± 10.58            |
|            | VEGF           | 299.25 ± 43.27      | 295.29 ± 34.71          | 246.06 ± 69.21           |

|                                     |           |                 |                         |                         |                          |
|-------------------------------------|-----------|-----------------|-------------------------|-------------------------|--------------------------|
|                                     | b-NGF     | 23.44 ± 1.99    | 24.37 ± 3.95            | 26.94 ± 4.69            | 28.49 ± 0.06             |
|                                     | bFGF      | 421.99 ± 31.45  | 440.64 ± 37.56          | 439.72 ± 57.48          | 438.48 ± 1.12            |
| Interleukins                        | IL-1Ra    | 214.21 ± 54.52  | <b>460.88 ± 45.29 *</b> | 392.48 ± 76.10          | <b>432.19 ± 99.44 *</b>  |
|                                     | IL-1α     | 98.89 ± 10.65   | <b>135.18 ± 27.18 *</b> | <b>136.10 ± 18.39 *</b> | <b>243.96 ± 165.50 *</b> |
|                                     | IL-1β     | 19.51 ± 1.86    | 21.07 ± 2.47            | 21.92 ± 2.23            | 20.58 ± 2.92             |
|                                     | IL-2      | 149.24 ± 4.19   | 150.22 ± 4.12           | 144.70 ± 8.08           | 151.69 ± 3.06            |
|                                     | IL-2Ra    | 119.07 ± 8.84   | <b>171.21 ± 42.27 *</b> | <b>149.88 ± 2.97 *</b>  | <b>164.16 ± 25.93 *</b>  |
|                                     | IL-3      | 13.24 ± 1.26    | 12.81 ± 1.33            | 13.42 ± 1.36            | 13.01 ± 0.49             |
|                                     | IL-4      | 12.36 ± 1.93    | <b>16.66 ± 1.14 *</b>   | <b>16.95 ± 1.34 *</b>   | <b>19.26 ± 0.80 *</b>    |
|                                     | IL-5      | 395.84 ± 32.67  | 395.14 ± 28.46          | 376.96 ± 35.28          | 403.31 ± 12.56           |
|                                     | IL-6      | 31.00 ± 3.52    | 28.05 ± 5.85            | 30.48 ± 6.39            | 25.38 ± 1.37             |
|                                     | IL-7      | 164.45 ± 17.43  | 151.94 ± 7.01           | 151.83 ± 5.01           | 161.31 ± 15.47           |
|                                     | IL-8      | 35.75 ± 5.37    | <b>24.24 ± 2.72 *</b>   | <b>24.72 ± 1.71 *</b>   | <b>23.63 ± 5.54 *</b>    |
|                                     | IL-9      | 21.04 ± 2.10    | 20.65 ± 3.02            | 18.35 ± 4.88            | 26.29 ± 5.97             |
|                                     | IL-10     | 11.22 ± 1.21    | <b>15.84 ± 2.50 *</b>   | 13.64 ± 1.23            | <b>18.39 ± 6.13 *</b>    |
|                                     | IL-12p40  | 626.63 ± 63.94  | 567.82 ± 82.43          | 551.69 ± 115.21         | 648.46 ± 15.70           |
|                                     | IL-12p70  | 274.80 ± 25.20  | 245.57 ± 57.42          | 281.88 ± 17.29          | 252.79 ± 59.12           |
|                                     | IL-13     | 24.16 ± 4.17    | 24.87 ± 6.43            | 23.50 ± 2.17            | 19.63 ± 1.79             |
|                                     | IL-15     | 1292.82 ± 12.72 | 1317.48 ± 41.93         | 1285.92 ± 14.96         | 1298.45 ± 27.51          |
|                                     | IL-16     | 99.38 ± 7.18    | 97.70 ± 9.64            | 101.96 ± 3.58           | 106.06 ± 2.07            |
|                                     | IL-17     | 195.56 ± 13.40  | 204.32 ± 12.40          | 217.41 ± 52.22          | 201.57 ± 10.87           |
|                                     | IL-18     | 69.20 ± 3.71    | 68.01 ± 4.73            | 70.35 ± 4.42            | 70.49 ± 1.17             |
| Urine kidney<br>damage mark-<br>ers | Calbindin | 3.99 ± 4.44     | <b>45.92 ± 38.44 *</b>  | <b>26.21 ± 23.39 *</b>  | <b>18.01 ± 14.16 *</b>   |
|                                     | GST-p     | 7.28 ± 8.61     | 6.59 ± 15.35            | 3.32 ± 4.82             | 5.70 ± 6.68              |
|                                     | IL-18     | 0.18 ± 0.37     | 0.05 ± 0.05             | 0.04 ± 0.06             | 0.08 ± 0.18              |
|                                     | KIM-1     | 3.45 ± 9.51     | 0.35 ± 0.35             | 0.53 ± 0.62             | 0.20 ± 0.21              |
|                                     | MCP-2     | 0.89 ± 1.20     | 1.16 ± 1.81             | 1.17 ± 1.85             | 0.35 ± 0.84              |
|                                     | Clusterin | 3.69 ± 6.39     | <b>17.11 ± 16.52 *</b>  | <b>14.70 ± 12.30 *</b>  | 5.32 ± 4.84              |

\* *p* adj. < 0.05 when compared with controls.
